# Supplementary material for: Ethylenediammonium diformate (EDDF) in PEG600: an efficient ambiphilic novel catalytic system for the one-pot synthesis of 4H-pyrans via Knoevenagel condensation
Source: Royal Society of Chemistry journal article supplement (doi:10.1039/c3ra42410c), 2013-01-01
Supplement: c3ra42410c.pdf [file c3ra42410c.pdf]

## Supporting Information

### Ethylenediammonium-diformate (EDDF) in PEG: An efficient ambiphilic novel catalytic system for the one-pot synthesis of 4*H*-pyrans via Knoevenagel condensation

Anuj Thakur,<sup>a</sup> Mohit Tripathi,<sup>a</sup> U. Chinna Rajesh<sup>a</sup> and Diwan S. Rawat,<sup>\*a</sup>

*Department of Chemistry, University of Delhi, Delhi-110007, India*

*Fax: 91-11-27667501; Tel: 91-11-27662683*

*\*E-mail: [dsrawat@chemistry.du.ac.in](mailto:dsrawat@chemistry.du.ac.in)*

|                                                                         |    |
|-------------------------------------------------------------------------|----|
| <b>Fig 1:</b> <sup>1</sup> H NMR of EDDF.....                           | 1  |
| <b>Fig 2:</b> <sup>13</sup> C NMR of EDDF.....                          | 1  |
| <b>Fig 3:</b> <sup>1</sup> H NMR of 4 <i>H</i> -pyran <b>7i</b> .....   | 2  |
| <b>Fig 4:</b> <sup>13</sup> C NMR of 4 <i>H</i> -pyran <b>7i</b> .....  | 2  |
| <b>Fig 5:</b> <sup>1</sup> H NMR of 4 <i>H</i> -pyran <b>7t</b> .....   | 3  |
| <b>Fig 6:</b> <sup>13</sup> C NMR of 4 <i>H</i> -pyran <b>7t</b> .....  | 3  |
| <b>Fig 7:</b> <sup>1</sup> H NMR of 4 <i>H</i> -pyran <b>7u</b> .....   | 4  |
| <b>Fig 8:</b> <sup>13</sup> C NMR of 4 <i>H</i> -pyran <b>7u</b> .....  | 4  |
| <b>Fig 9:</b> <sup>1</sup> H NMR of 4 <i>H</i> -pyran <b>7v</b> .....   | 5  |
| <b>Fig 10:</b> <sup>13</sup> C NMR of 4 <i>H</i> -pyran <b>7v</b> ..... | 5  |
| <b>Fig 11:</b> <sup>1</sup> H NMR of 4 <i>H</i> -pyran <b>8a</b> .....  | 6  |
| <b>Fig 12:</b> <sup>13</sup> C NMR of 4 <i>H</i> -pyran <b>8a</b> ..... | 6  |
| <b>Fig 13:</b> <sup>1</sup> H NMR of 4 <i>H</i> -pyran <b>9a</b> .....  | 7  |
| <b>Fig 14:</b> <sup>1</sup> H NMR of spirooxindole <b>11a</b> .....     | 7  |
| <b>Fig 15:</b> <sup>13</sup> C NMR of spirooxindole <b>11a</b> .....    | 8  |
| <b>Fig 16:</b> <sup>1</sup> H NMR of spirooxindole <b>12a</b> .....     | 8  |
| <b>Fig 17:</b> <sup>13</sup> C NMR of spirooxindole <b>12a</b> .....    | 9  |
| <b>Fig 18:</b> <sup>1</sup> H NMR of spirooxindole <b>13a</b> .....     | 9  |
| <b>Fig 19:</b> <sup>13</sup> C NMR of spirooxindole <b>13a</b> .....    | 10 |

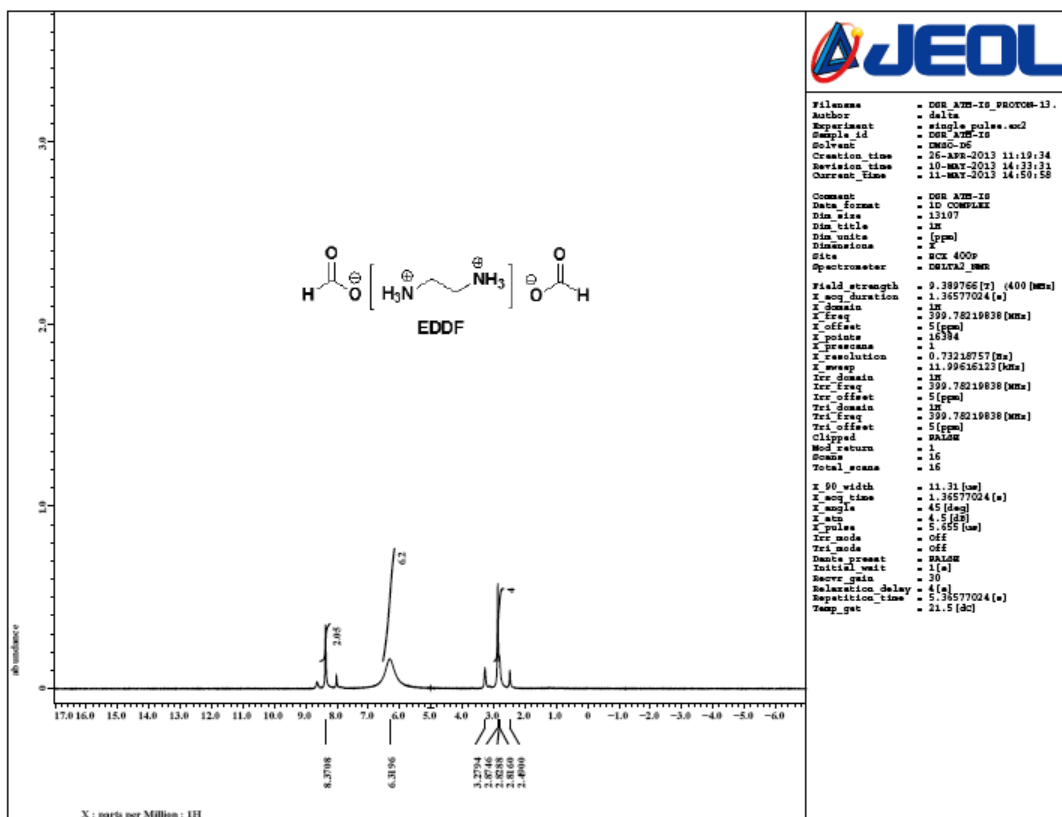

Fig 1: <sup>1</sup>H NMR of Ethylenediammonium-diformate (EDDF)

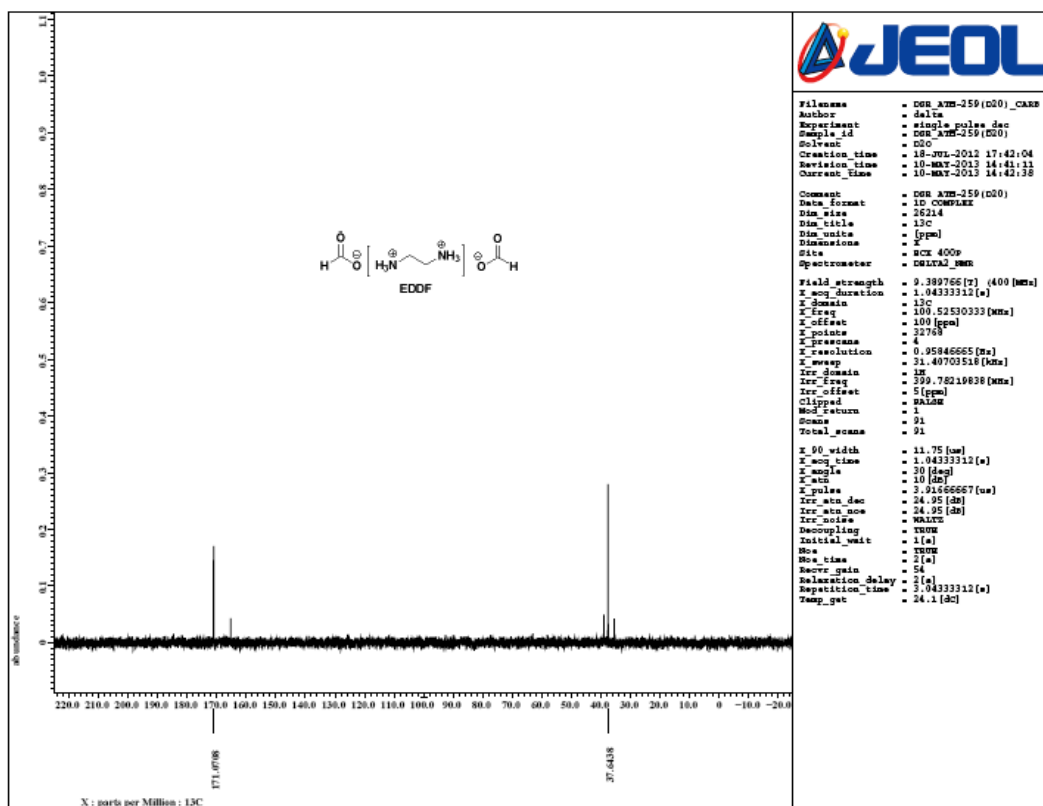

Fig 2: <sup>13</sup>C NMR of Ethylenediammonium-diformate (EDDF)

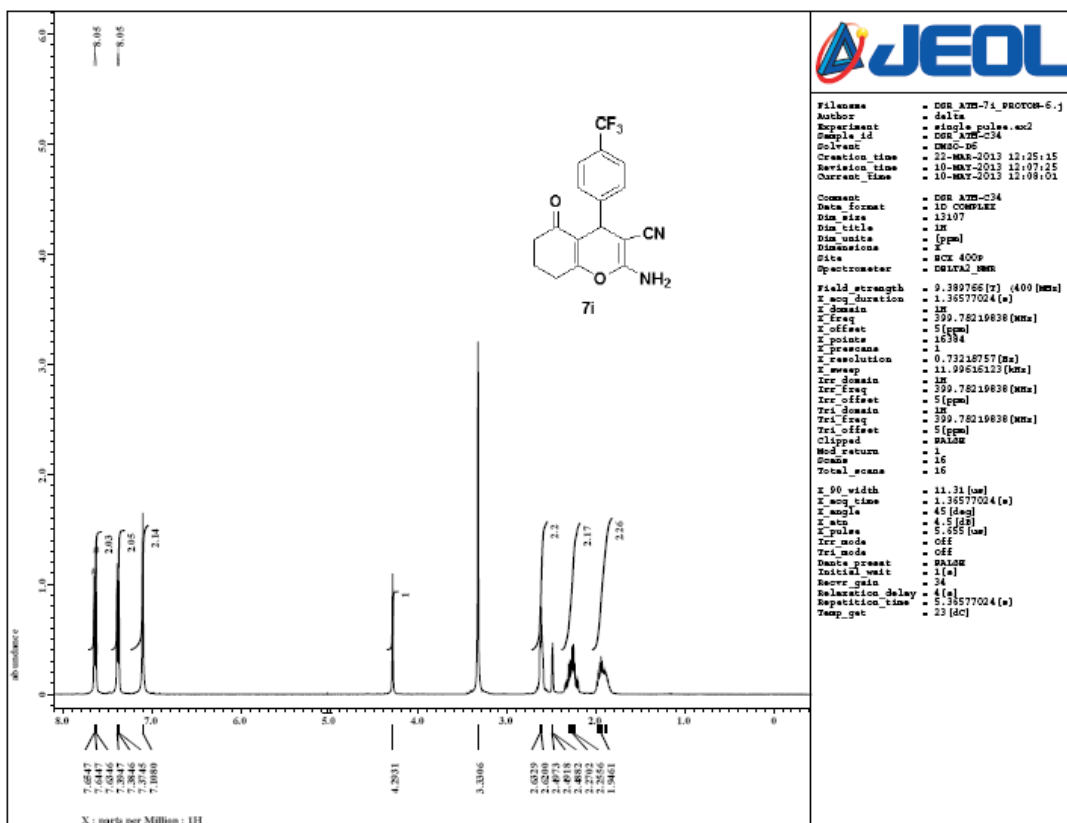

Fig 3: <sup>1</sup>H NMR of 4H-pyran 7i

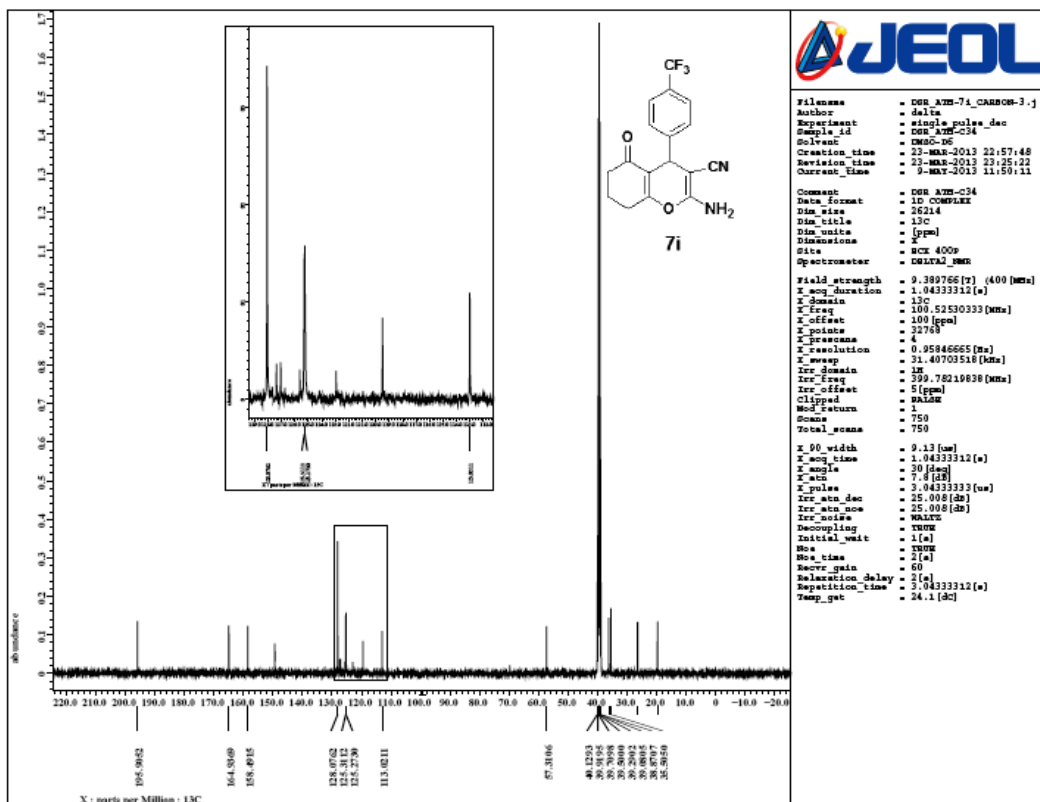

Fig 4: <sup>13</sup>C NMR of 4H-pyran 7i

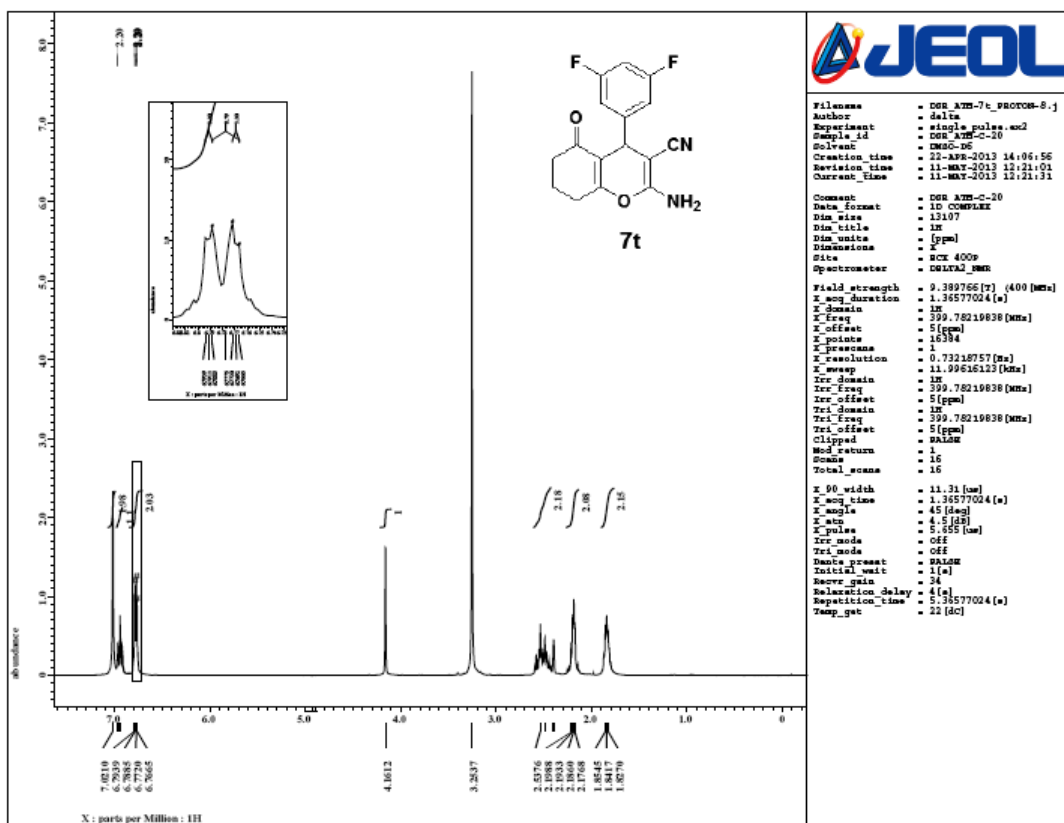

Fig 5: <sup>1</sup>H NMR of 4H-pyran 7t

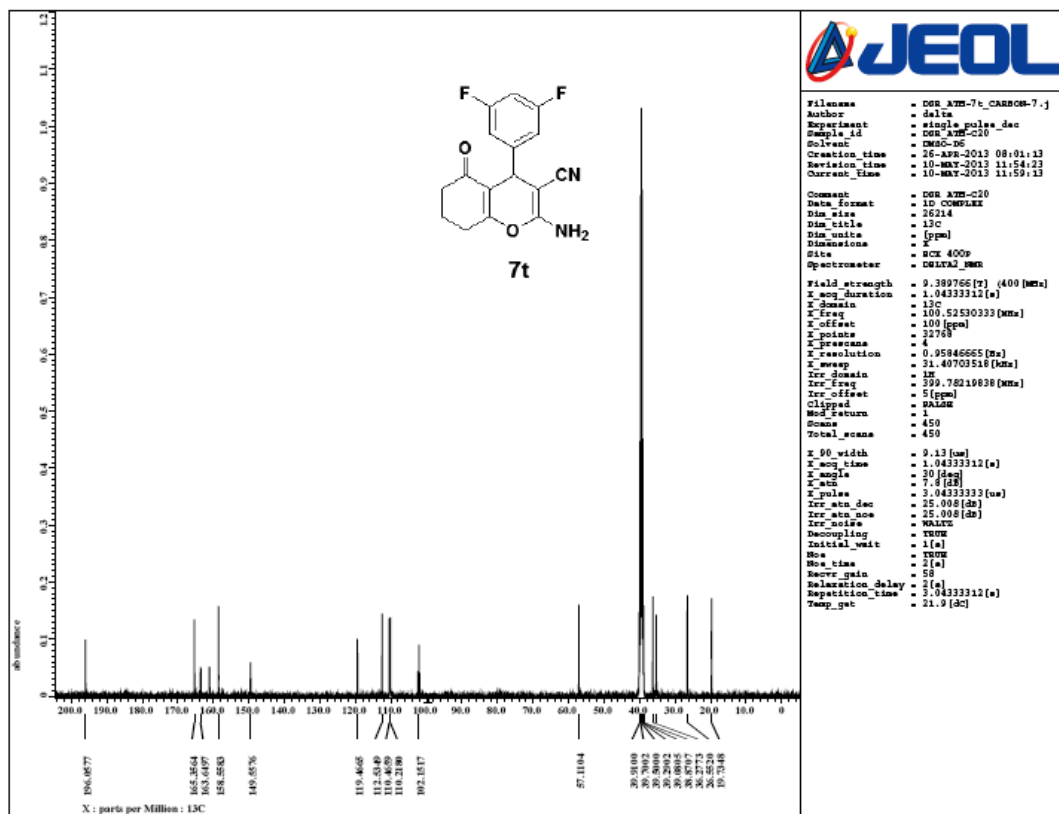

Fig 6: <sup>13</sup>C NMR of 4H-pyran 7t

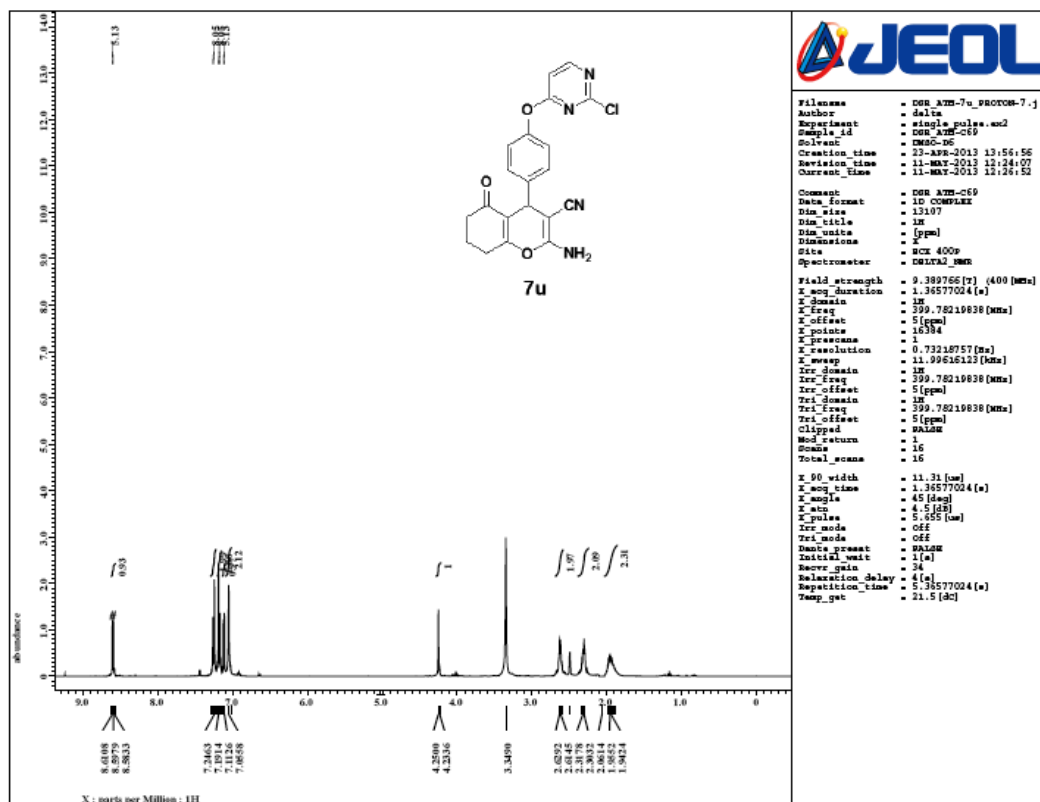

Fig 7: <sup>1</sup>H NMR of 4H-pyran 7u

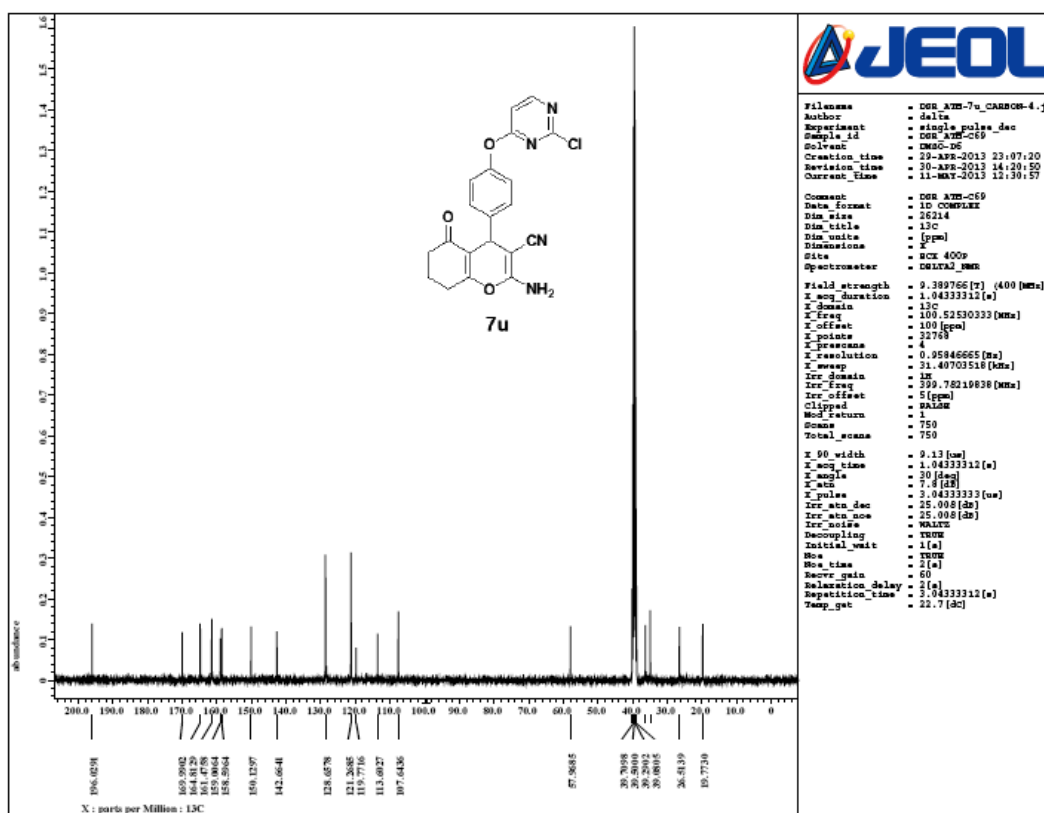

Fig 8: <sup>13</sup>C NMR of 4H-pyran 7u



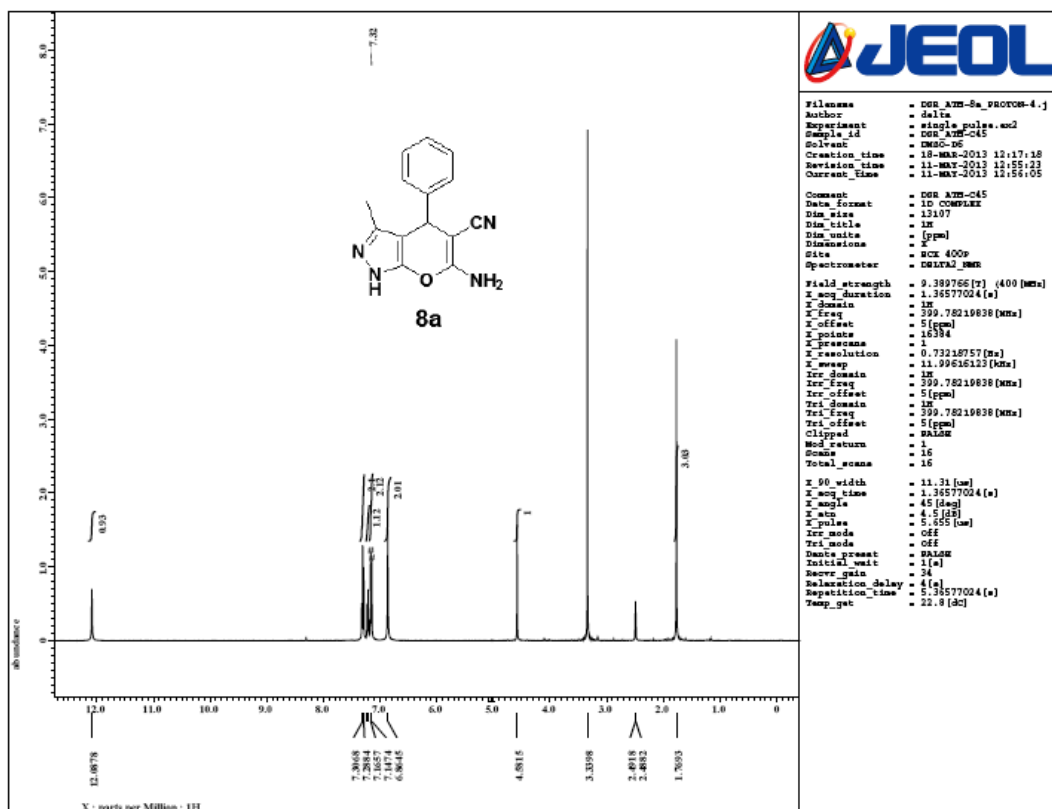

Fig 11: <sup>1</sup>H NMR of 4H-pyran 8a

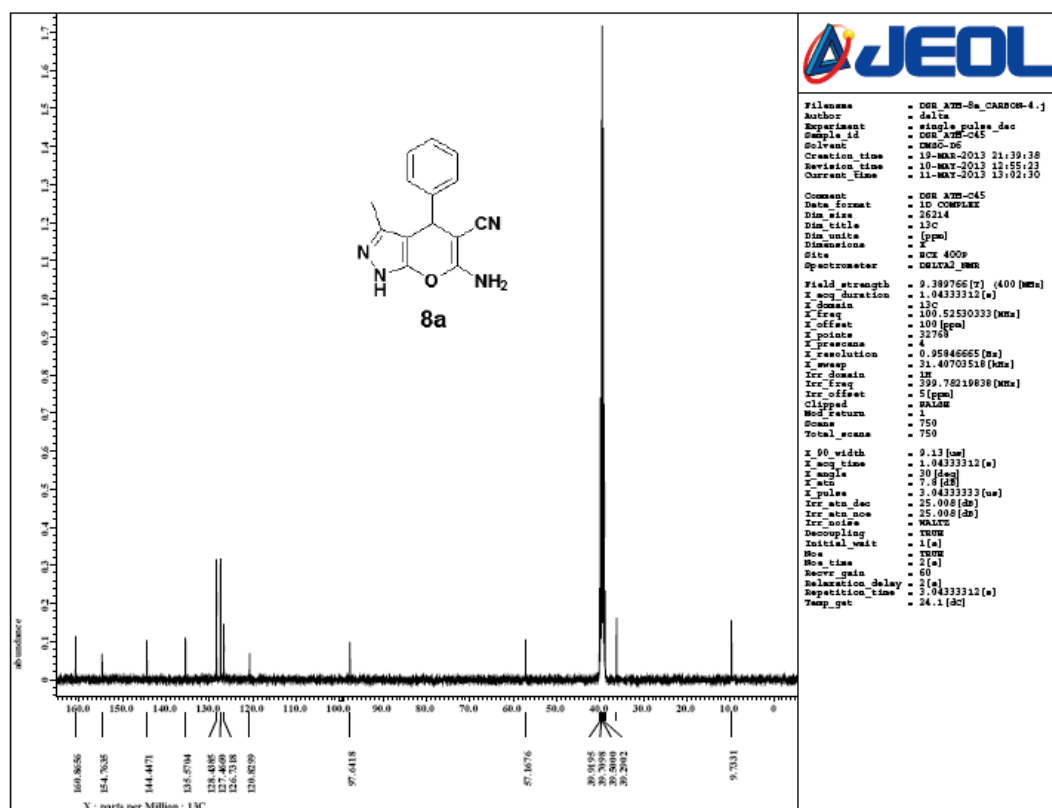

Fig 12: <sup>13</sup>C NMR of 4H-pyran 8a

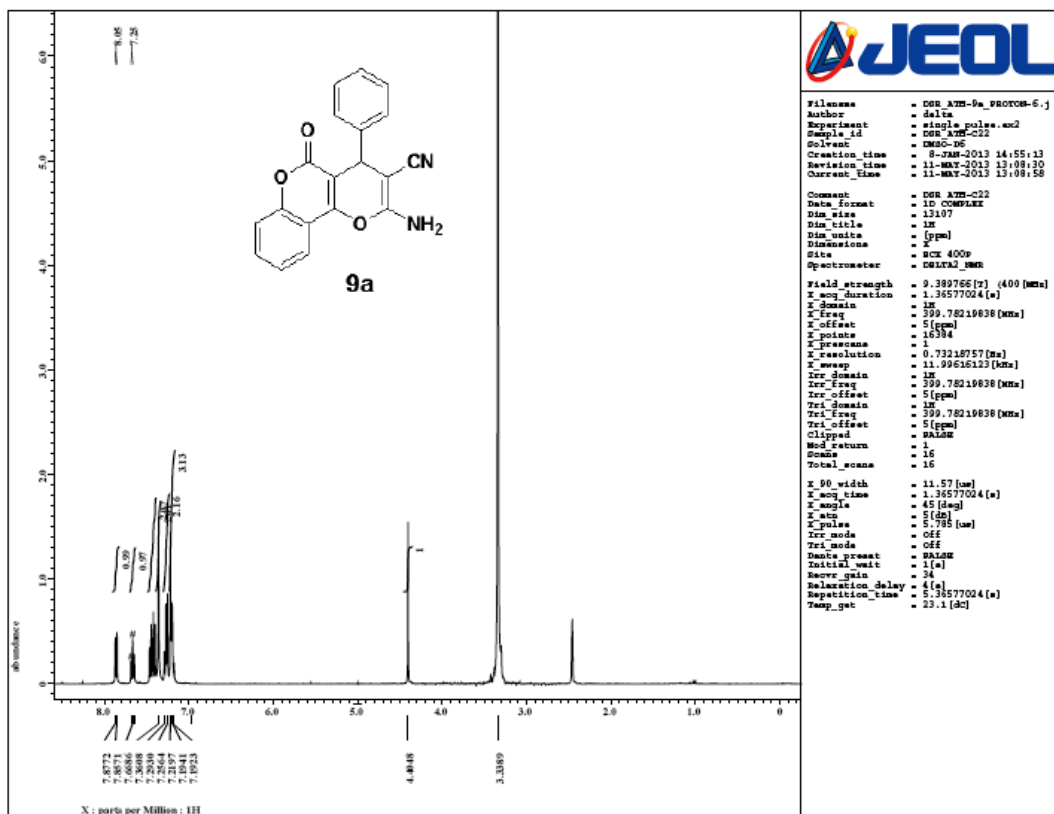

Fig 13: <sup>1</sup>H NMR of 4H-pyran 9a

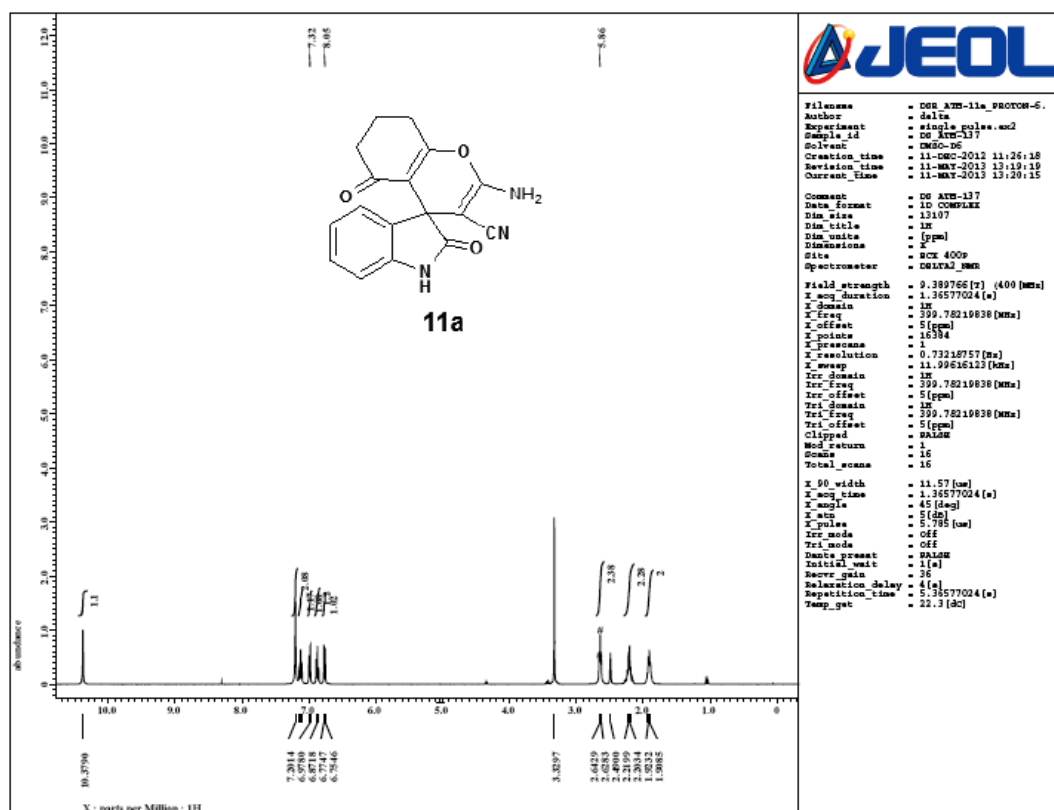

Fig 14: <sup>1</sup>H NMR of spirooxindole 11a



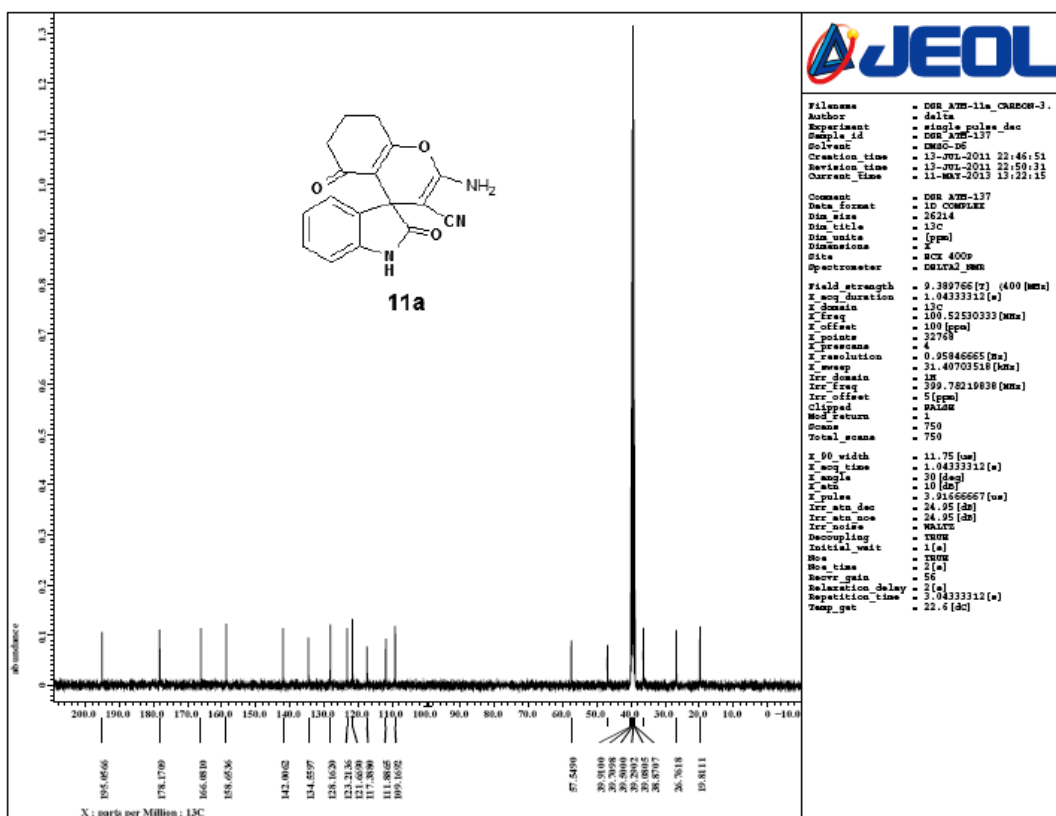

Fig 15:  $^{13}\text{C}$  NMR of spirooxindole 11a

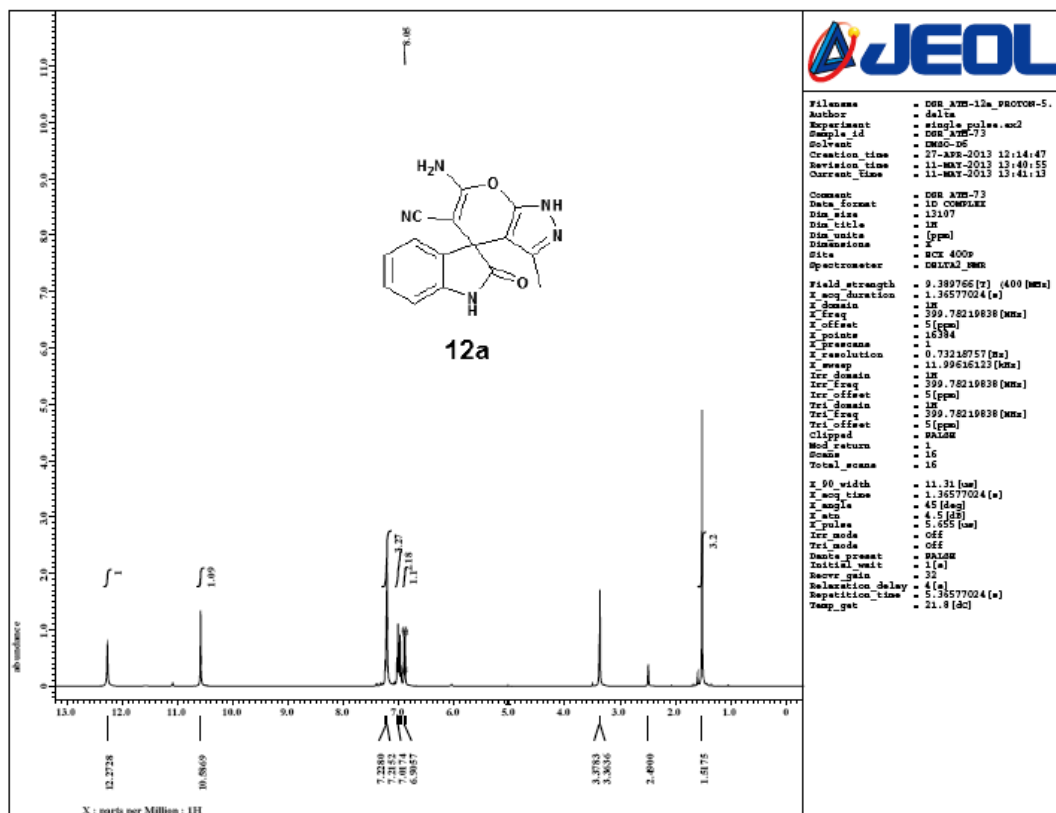

Fig 16:  $^1\text{H}$  NMR of spirooxindole 12a

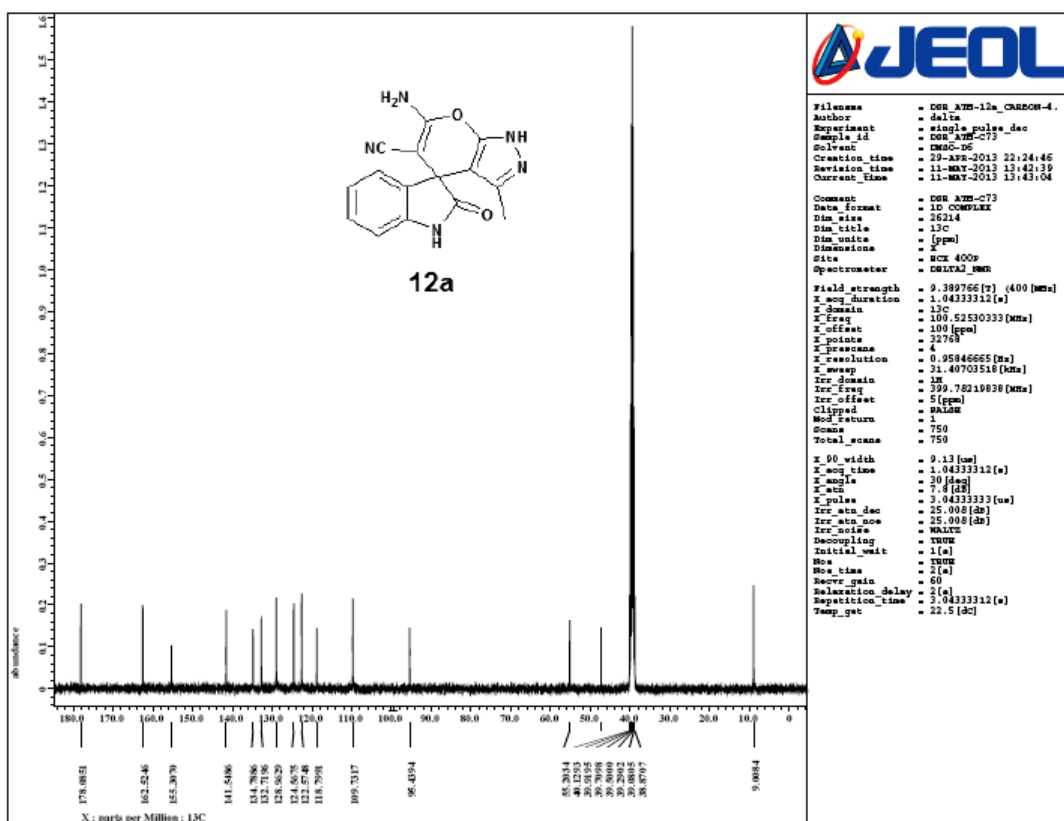

Fig 17: <sup>13</sup>C NMR of spirooxindole 12a

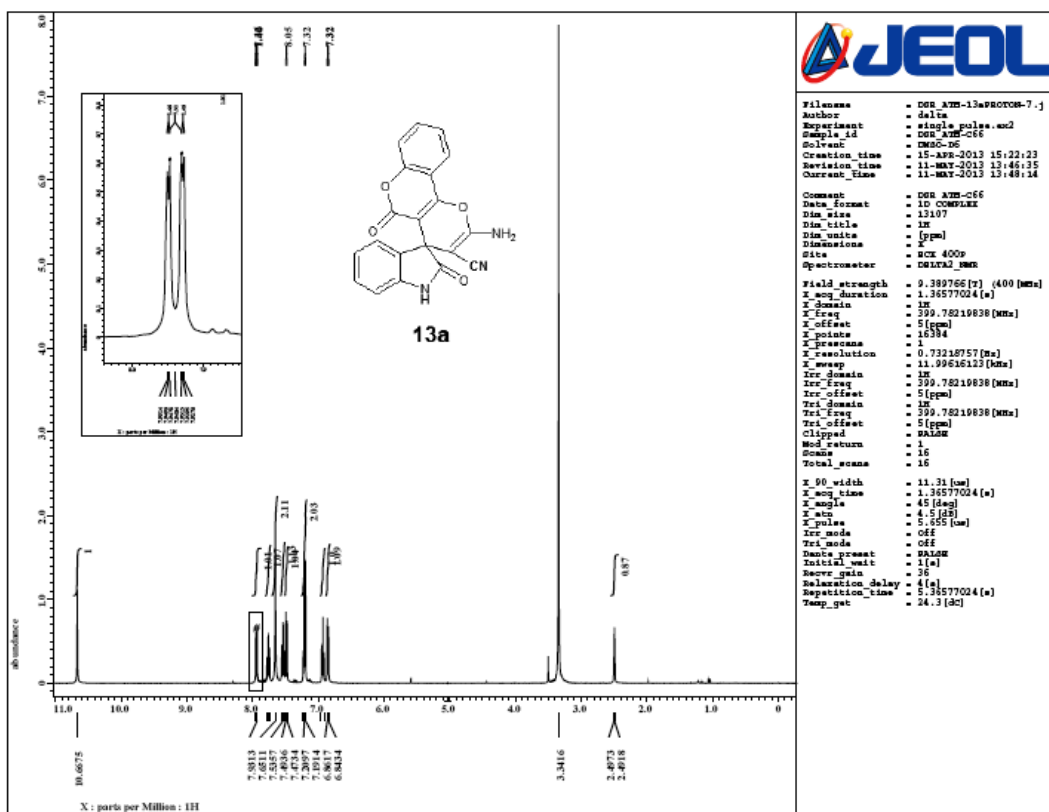

Fig 18: <sup>1</sup>H NMR of spirooxindole 13a

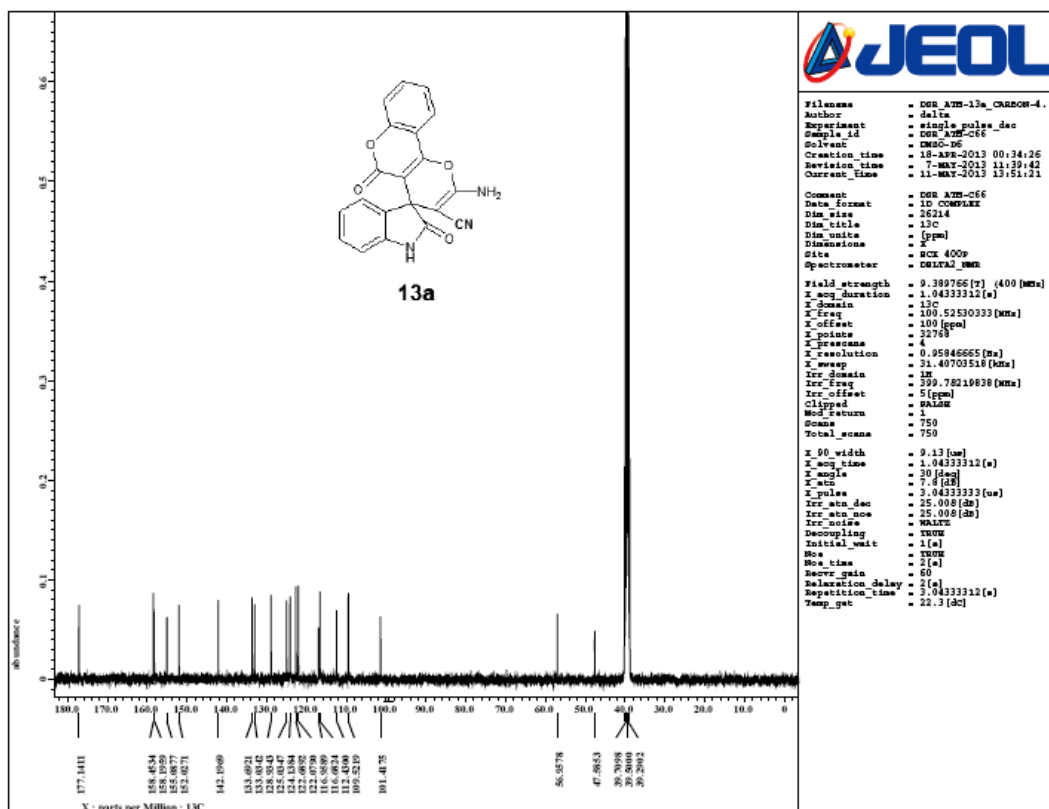

Fig 19:  $^{13}\text{C}$  NMR of spirooxindole 13a
